# Supplementary material for: Comprehensive Analysis and Prognosis Prediction of N6-methyladenosine-related Lncrnas in Immune Microenvironment Infiltration of Gastric Cancer
Source: Research Square preprint supplement (doi:10.21203/rs.3.rs-1021150/v1), 2021-10-28
Supplement: Supplementary file 1 [file 4aee5d653daba7e9beeb127e.xlsx]

## Sheet: Sheet1
m6A	lncRNA	cor	pvalue	Regulation
ZC3H13	AL512506.1	0.518775	3.19331e-27	postive
HNRNPA2B1	AC022405.1	0.401541	5.82243e-16	postive
YTHDC1	CAPN10-DT	0.407433	1.98354e-16	postive
HNRNPA2B1	AC017083.1	0.417441	3.03026e-17	postive
ZC3H13	ODF2-AS1	0.444163	1.4614e-19	postive
YTHDC2	AC090948.2	0.454118	1.77013e-20	postive
ZC3H13	AC005519.1	0.446645	8.68947e-20	postive
YTHDC1	AC005519.1	0.515532	7.5469e-27	postive
HNRNPA2B1	AC092718.4	0.4712	4.01133e-22	postive
METTL16	LINC01521	0.451094	3.38641e-20	postive
RBM15B	LINC01521	0.441085	2.76795e-19	postive
ZC3H13	AC245884.8	0.43189	1.79584e-18	postive
IGFBP1	TSPEAR-AS1	0.583407	1.4057e-35	postive
YTHDC1	ZBTB40-IT1	0.402108	5.25428e-16	postive
FTO	AC008764.2	0.444094	1.4827e-19	postive
ZC3H13	AC090198.1	0.400765	6.69988e-16	postive
METTL3	TMEM147-AS1	0.432875	1.47388e-18	postive
YTHDC1	TMEM147-AS1	0.408071	1.76271e-16	postive
IGFBP3	AC010931.1	0.41601	3.9796e-17	postive
ZC3H13	AL138820.1	0.509397	3.74595e-26	postive
YTHDC1	ERVK13-1	0.423942	8.64246e-18	postive
ZC3H13	AC015849.3	0.445896	1.01705e-19	postive
YTHDC1	AC015849.3	0.452454	2.53157e-20	postive
YTHDC1	AL132989.1	0.492574	2.57555e-24	postive
ZC3H13	LINC00265	0.449369	4.88786e-20	postive
YTHDF1	AL121832.2	0.40044	7.10422e-16	postive
YTHDC1	MED8-AS1	0.412229	8.12391e-17	postive
YTHDC1	AC008115.3	0.453885	1.8614e-20	postive
YTHDC2	AC008115.3	0.415773	4.16256e-17	postive
ZC3H13	AL161891.1	0.603143	1.60664e-38	postive
YTHDC1	AC015982.2	0.43056	2.34276e-18	postive
ZC3H13	AL022328.2	0.402248	5.12297e-16	postive
YTHDC1	AL022328.2	0.478357	7.69516e-23	postive
HNRNPA2B1	AC093484.4	0.44061	3.0532e-19	postive
ZC3H13	AC002558.3	0.430004	2.61736e-18	postive
YTHDC1	AC109460.2	0.411982	8.50939e-17	postive
YTHDC1	AL096701.3	0.45562	1.27961e-20	postive
ZC3H13	AC108727.1	0.431718	1.85893e-18	postive
YTHDC1	AC108727.1	0.428097	3.82099e-18	postive
IGFBP1	TSPEAR-AS2	0.568889	1.5389e-33	postive
YTHDC1	AL021878.2	0.500104	3.99039e-25	postive
ZC3H13	AL157932.1	0.491572	3.28903e-24	postive
YTHDC1	AP000873.4	0.424049	8.46391e-18	postive
YTHDC1	AC007390.1	0.495963	1.11899e-24	postive
ZC3H13	AC135050.6	0.404326	3.50947e-16	postive
ZC3H13	MIR17HG	0.40358	4.02061e-16	postive
ZC3H13	AC012213.3	0.444235	1.43968e-19	postive
METTL16	AL513550.1	0.432509	1.58636e-18	postive
YTHDC1	AC008735.2	0.468791	6.93213e-22	postive
YTHDC1	PSMA3-AS1	0.587413	3.68984e-36	postive
YTHDF1	AC022211.3	0.425481	6.39617e-18	postive
YTHDC1	INE1	0.442871	1.91255e-19	postive
YTHDC1	AC010319.4	0.402753	4.67393e-16	postive
YTHDC1	DPP9-AS1	0.418112	2.66546e-17	postive
ZC3H13	AL133243.3	0.462948	2.56667e-21	postive
YTHDC1	AL133243.3	0.404208	3.58597e-16	postive
YTHDC1	AL139095.4	0.401798	5.55848e-16	postive
FTO	LINC02256	0.506192	8.53995e-26	postive
ZC3H13	AC007938.3	0.41885	2.31385e-17	postive
HNRNPA2B1	AL451050.2	0.456627	1.02852e-20	postive
YTHDC2	AC116366.2	0.430577	2.33489e-18	postive
YTHDC1	AC092119.2	0.421072	1.5086e-17	postive
YTHDF1	AL162595.1	0.488656	6.6733e-24	postive
FTO	CADM3-AS1	0.447482	7.2853e-20	postive
FTO	NR2F2-AS1	0.442748	1.96202e-19	postive
YTHDC1	AC093495.1	0.427195	4.56558e-18	postive
YTHDC2	AC093495.1	0.431457	1.95842e-18	postive
YTHDF1	AFDN-DT	0.419541	2.02648e-17	postive
ZC3H13	AL137244.1	0.466822	1.08054e-21	postive
HNRNPA2B1	AC008808.2	-0.416945	3.33079e-17	negative
FTO	AC008808.2	0.478297	7.80419e-23	postive
FTO	AC107959.1	0.516946	5.1928e-27	postive
YTHDC1	AL049840.5	0.401899	5.45774e-16	postive
FTO	RBMS3-AS3	0.418461	2.49303e-17	postive
FTO	OXCT1-AS1	0.444868	1.26141e-19	postive
YTHDC1	AC009095.1	0.440353	3.21916e-19	postive
YTHDC1	AC138956.2	0.505529	1.01175e-25	postive
YTHDC2	AC138956.2	0.462664	2.73369e-21	postive
ZC3H13	AP000240.1	0.474309	1.96703e-22	postive
ZC3H13	AL121583.1	0.42877	3.34408e-18	postive
ZC3H13	AC127024.4	0.425889	5.90369e-18	postive
METTL3	SNHG1	0.414811	4.99498e-17	postive
HNRNPC	SNHG1	0.413767	6.08335e-17	postive
LRPPRC	SNHG1	0.474257	1.99066e-22	postive
HNRNPA2B1	SNHG1	0.498379	6.14166e-25	postive
RBMX	SNHG1	0.549059	6.52436e-31	postive
ZC3H13	SND1-IT1	0.493079	2.2759e-24	postive
FTO	AL356489.2	0.417027	3.27926e-17	postive
ZC3H13	AC074117.1	0.402924	4.53098e-16	postive
YTHDF1	AC074117.1	0.498655	5.73396e-25	postive
YTHDC1	LINC01089	0.404806	3.21423e-16	postive
ZC3H13	AL080317.1	0.45268	2.41167e-20	postive
YTHDC1	AL132989.2	0.431769	1.84005e-18	postive
ZC3H13	AL031670.1	0.411477	9.3541e-17	postive
YTHDC1	AL031670.1	0.466882	1.06601e-21	postive
HNRNPA2B1	AL138759.1	0.413033	6.98548e-17	postive
YTHDC1	MANEA-DT	0.502777	2.03547e-25	postive
YTHDC1	AC138028.4	0.416077	3.92863e-17	postive
YTHDF1	UCKL1-AS1	0.466188	1.24572e-21	postive
ZC3H13	LINC01176	0.417607	2.93536e-17	postive
YTHDC1	LINC00894	0.454359	1.6806e-20	postive
FMR1	LINC00894	0.463509	2.26577e-21	postive
YTHDC1	AC087289.2	0.441608	2.48461e-19	postive
ZC3H13	AC084824.5	0.453608	1.97594e-20	postive
YTHDC1	AC084824.5	0.48154	3.6463e-23	postive
YTHDC1	PABPC4-AS1	0.415599	4.30181e-17	postive
ZC3H13	AC090589.3	0.415184	4.65419e-17	postive
YTHDC1	AC090589.3	0.477593	9.1952e-23	postive
ZC3H13	AC010300.1	0.440055	3.42302e-19	postive
ZC3H13	MED4-AS1	0.45374	1.92055e-20	postive
YTHDC1	AC138956.1	0.522122	1.30161e-27	postive
YTHDC2	AC138956.1	0.509226	3.91522e-26	postive
HNRNPC	ADAMTS9-AS2	-0.419335	2.10838e-17	negative
FTO	ADAMTS9-AS2	0.520949	1.78462e-27	postive
ZC3H13	AC006480.3	0.413102	6.89498e-17	postive
YTHDC1	AC015971.1	0.410479	1.12714e-16	postive
ZC3H13	AL356019.2	0.416519	3.61217e-17	postive
ZC3H13	AL080317.2	0.461745	3.35023e-21	postive
YTHDC1	AL391684.1	0.408637	1.58736e-16	postive
YTHDC1	YEATS2-AS1	0.507497	6.11252e-26	postive
ZC3H13	AC134407.1	0.409692	1.30497e-16	postive
ZC3H13	AC087521.2	0.403008	4.46225e-16	postive
FTO	AC124312.3	0.492255	2.78447e-24	postive
ZC3H13	WASHC5-AS1	0.428343	3.63919e-18	postive
FTO	LINC02106	0.434733	1.01362e-18	postive
YTHDC1	AL049840.2	0.432524	1.58173e-18	postive
FTO	SNHG14	0.46255	2.80347e-21	postive
YTHDF1	DLGAP1-AS2	0.408086	1.75796e-16	postive
FTO	BVES-AS1	0.41736	3.07737e-17	postive
RBM15	AL132639.3	0.410457	1.13178e-16	postive
HNRNPA2B1	AL132639.3	0.420653	1.63586e-17	postive
YTHDC1	NFYC-AS1	0.519813	2.41996e-27	postive
ZC3H13	RNASEH2B-AS1	0.43987	3.55564e-19	postive
ZC3H13	ANKRD10-IT1	0.492281	2.76658e-24	postive
YTHDC1	ANKRD10-IT1	0.436838	6.61209e-19	postive
ZC3H13	AC099568.2	0.415567	4.32841e-17	postive
FTO	AC026691.1	0.507957	5.43047e-26	postive
YTHDC1	AC005306.1	0.429881	2.68214e-18	postive
HNRNPC	Z99289.1	-0.449061	5.21746e-20	negative
FTO	Z99289.1	0.438047	5.16668e-19	postive
YTHDF1	LINC01719	0.403904	3.7902e-16	postive
YTHDC2	AC036103.1	0.422061	1.24599e-17	postive
FTO	AL049796.1	0.453932	1.8427e-20	postive
ZC3H13	AL138955.1	0.418899	2.29222e-17	postive
ZC3H13	AL078581.4	0.404713	3.26982e-16	postive
HNRNPC	AC135012.3	-0.422486	1.14735e-17	negative
HNRNPA2B1	AC135012.3	-0.412794	7.30709e-17	negative
FTO	AC135012.3	0.464972	1.63565e-21	postive
ZC3H13	AC027279.1	0.402553	4.84667e-16	postive
YTHDC2	AC098869.2	0.440921	2.86343e-19	postive
ZC3H13	AL357079.1	0.426874	4.8642e-18	postive
YTHDC1	AP001001.1	0.46706	1.02418e-21	postive
YTHDC2	AP001001.1	0.427904	3.9698e-18	postive
FTO	AC010980.2	0.401766	5.59001e-16	postive
ZC3H13	AC002558.2	0.434459	1.07133e-18	postive
YTHDC1	AC024361.3	0.46754	9.19421e-22	postive
FTO	NALT1	0.401305	6.07678e-16	postive
HNRNPA2B1	SCAT2	0.422061	1.24597e-17	postive
ZC3H13	AC026471.4	0.404842	3.19354e-16	postive
YTHDC1	AC087289.1	0.428589	3.4665e-18	postive
YTHDC1	AC010761.3	0.412137	8.26649e-17	postive
YTHDC1	AL359922.2	0.402277	5.09556e-16	postive
HNRNPC	MIR99AHG	-0.418075	2.68442e-17	negative
HNRNPA2B1	MIR99AHG	-0.441171	2.71942e-19	negative
FTO	MIR99AHG	0.48956	5.36279e-24	postive
METTL3	MCM3AP-AS1	0.426621	5.11251e-18	postive
RBM15	MCM3AP-AS1	0.402533	4.86461e-16	postive
YTHDC1	MCM3AP-AS1	0.403119	4.37304e-16	postive
HNRNPA2B1	MIR100HG	-0.435565	8.56363e-19	negative
FTO	MIR100HG	0.529858	1.57372e-28	postive
YTHDC1	AC097641.2	0.404312	3.51808e-16	postive
YTHDC1	AC116913.1	0.445228	1.16985e-19	postive
ZC3H13	AZIN1-AS1	0.427626	4.19343e-18	postive
ZC3H13	AL133243.2	0.450088	4.19533e-20	postive
ZC3H13	AC055855.2	0.412045	8.40994e-17	postive
YTHDC1	AC055855.2	0.444072	1.48936e-19	postive
YTHDF1	AL096828.3	0.431821	1.82108e-18	postive
YTHDF1	AL121832.3	0.401569	5.79341e-16	postive
VIRMA	AC083843.3	0.41359	6.2896e-17	postive
YTHDC1	AC073575.4	0.442195	2.20038e-19	postive
YTHDC1	AC025034.1	0.419706	1.96304e-17	postive
YTHDF1	TDRKH-AS1	0.404375	3.47805e-16	postive
FTO	LYPLAL1-DT	0.443213	1.78101e-19	postive
YTHDC1	AC068790.3	0.43413	1.14491e-18	postive
IGFBP1	FOXCUT	0.4319	1.79238e-18	postive
FTO	AL356599.1	0.493351	2.12898e-24	postive
RBM15B	OGFRP1	0.432567	1.56818e-18	postive
FTO	AC002398.2	0.459937	4.9902e-21	postive
ZC3H13	AL035071.1	0.495155	1.3661e-24	postive
YTHDC1	AP000442.1	0.497144	8.35019e-25	postive
ZC3H13	AC068620.2	0.430743	2.25886e-18	postive
YTHDC1	AC068620.2	0.435104	9.40319e-19	postive
FTO	AC105942.1	0.493065	2.28341e-24	postive
ZC3H13	BACH1-IT1	0.478371	7.66954e-23	postive
HNRNPC	FENDRR	-0.44651	8.93985e-20	negative
HNRNPA2B1	FENDRR	-0.425341	6.5744e-18	negative
FTO	FENDRR	0.545488	1.85888e-30	postive
YTHDF1	SNHG11	0.463163	2.44699e-21	postive
ZC3H13	AL583810.1	0.408086	1.75779e-16	postive
YTHDC1	AL157392.3	0.481345	3.81762e-23	postive
ZC3H13	PAN3-AS1	0.437346	5.9622e-19	postive
YTHDC1	AC129510.1	0.424165	8.27413e-18	postive
FTO	AL513217.1	0.457439	8.61917e-21	postive
YTHDC1	AL365330.1	0.484402	1.85059e-23	postive
YTHDC1	AC091185.1	0.434175	1.13454e-18	postive
YTHDC2	AC091185.1	0.469877	5.419e-22	postive
RBM15	AC018695.4	0.427966	3.92154e-18	postive
YTHDC1	AC018695.4	0.489954	4.87474e-24	postive
ZC3H13	LINC01409	0.47345	2.39697e-22	postive
YTHDC1	LINC01409	0.478176	8.02686e-23	postive
HNRNPA2B1	AL133215.2	0.403674	3.95226e-16	postive
YTHDC1	AC018926.1	0.40678	2.23701e-16	postive
YTHDC1	UBE2Q1-AS1	0.43247	1.59897e-18	postive
YTHDC1	ZNF213-AS1	0.401992	5.36621e-16	postive
YTHDC1	AC063965.2	0.414205	5.60111e-17	postive
YTHDC1	AL355388.1	0.415287	4.5642e-17	postive
YTHDC1	GARS1-DT	0.41573	4.19628e-17	postive
YTHDC1	AL031775.2	0.437056	6.32584e-19	postive
IGFBP1	STK24-AS1	0.549371	5.94999e-31	postive
HNRNPA2B1	SNHG15	0.404918	3.14909e-16	postive
RBMX	SNHG15	0.418205	2.61825e-17	postive
FTO	FLRT1	0.41868	2.39062e-17	postive
YTHDC1	USP3-AS1	0.454648	1.57904e-20	postive
YTHDC1	SEMA3F-AS1	0.461537	3.50792e-21	postive
YTHDC2	SEMA3F-AS1	0.416893	3.3641e-17	postive
ZC3H13	Z94721.1	0.422815	1.07633e-17	postive
FTO	AP001189.3	0.470213	5.02128e-22	postive
YTHDC1	CR936218.1	0.526475	3.99078e-28	postive
YTHDC2	CR936218.1	0.429025	3.17957e-18	postive
ZC3H13	AL353796.1	0.459804	5.13806e-21	postive
YTHDC1	AC005785.1	0.443193	1.78854e-19	postive
METTL3	SNHG3	0.466519	1.15663e-21	postive
LRPPRC	SNHG3	0.466454	1.17373e-21	postive
RBMX	SNHG3	0.412115	8.30012e-17	postive
YTHDC1	AC006435.2	0.462974	2.55157e-21	postive
YTHDF1	RASAL2-AS1	0.442032	2.27606e-19	postive
YTHDC1	C3orf35	0.449525	4.72831e-20	postive
YTHDC1	AC025287.3	0.40785	1.83622e-16	postive
YTHDC1	Z83843.1	0.410439	1.1356e-16	postive
ZC3H13	PSPC1-AS2	0.489291	5.72366e-24	postive
YTHDC1	PSPC1-AS2	0.454084	1.78309e-20	postive
FTO	MBNL1-AS1	0.45741	8.67427e-21	postive
YTHDC1	AL359921.1	0.442888	1.90561e-19	postive
YTHDC1	AL354733.3	0.530997	1.14767e-28	postive
RBM15B	AC005586.1	0.41552	4.36727e-17	postive
ZC3H13	AL139287.1	0.434549	1.05187e-18	postive
VIRMA	OTUD6B-AS1	0.555614	9.23639e-32	postive
ZC3H13	AC010327.5	0.408969	1.49256e-16	postive
HNRNPA2B1	AP003071.4	-0.400963	6.46482e-16	negative
FTO	AP003071.4	0.518871	3.11192e-27	postive
YTHDC1	AC090739.1	0.451395	3.17552e-20	postive
YTHDC1	AC096586.2	0.435929	7.95487e-19	postive
ZC3H13	AC067852.3	0.450092	4.19217e-20	postive
YTHDC1	CCDC18-AS1	0.458602	6.68694e-21	postive
RBM15	AC131971.1	0.482741	2.74551e-23	postive
YTHDC1	AL450998.3	0.469608	5.76087e-22	postive
YTHDC1	AC137932.3	0.544831	2.25102e-30	postive
YTHDC2	AL133406.2	0.429394	2.95455e-18	postive
ZC3H13	N4BP2L2-IT2	0.516643	5.62623e-27	postive
YTHDC1	N4BP2L2-IT2	0.424776	7.34254e-18	postive
ZC3H13	AC068533.3	0.421201	1.47162e-17	postive
YTHDF1	MRPL20-AS1	0.401635	5.72466e-16	postive
ZC3H13	AC012615.6	0.411361	9.55883e-17	postive
YTHDC1	AC012615.6	0.451436	3.14755e-20	postive
YTHDC1	PIK3IP1-AS1	0.42466	7.51121e-18	postive
YTHDC1	AL022328.3	0.471256	3.96001e-22	postive
YTHDC2	AL022328.3	0.412179	8.20095e-17	postive
FTO	MIR1-1HG-AS1	0.476512	1.18225e-22	postive
ZC3H13	AL390961.2	0.410371	1.15e-16	postive
HNRNPC	RAP2C-AS1	-0.424267	8.11027e-18	negative
FTO	RAP2C-AS1	0.558084	4.37203e-32	postive
RBM15	AC084018.2	0.434409	1.08208e-18	postive
YTHDC1	AC084018.2	0.400203	7.41481e-16	postive
YTHDC1	AC007533.2	0.418919	2.28366e-17	postive
LRPPRC	SENCR	-0.437447	5.84015e-19	negative
RBM15	LINC00630	0.420914	1.55552e-17	postive
FMR1	LINC00630	0.48847	6.97991e-24	postive
IGFBP1	AL020995.1	0.597291	1.25743e-37	postive
ZC3H13	PTOV1-AS1	0.400437	7.10787e-16	postive
YTHDC1	PTOV1-AS1	0.416591	3.5629e-17	postive
ZC3H13	AL139120.1	0.462401	2.89728e-21	postive
ZC3H13	AC108134.3	0.416448	3.66096e-17	postive
HNRNPC	LINC01081	-0.409408	1.37579e-16	negative
FTO	LINC01081	0.464684	1.74413e-21	postive
ZC3H13	ZKSCAN2-DT	0.451489	3.11198e-20	postive
YTHDC1	ZKSCAN2-DT	0.483109	2.51572e-23	postive
ZC3H13	DLEU2	0.471525	3.72473e-22	postive
HNRNPA2B1	DLEU2	0.434029	1.16849e-18	postive
IGFBP1	AP000894.4	0.421739	1.32598e-17	postive
YTHDC1	AC005253.1	0.453551	2.00012e-20	postive
YTHDF1	Z95115.1	0.419423	2.07299e-17	postive
ZC3H13	AC005261.3	0.496715	9.2889e-25	postive
HNRNPC	MAGI2-AS3	-0.459551	5.43118e-21	negative
HNRNPA2B1	MAGI2-AS3	-0.476879	1.08552e-22	negative
FTO	MAGI2-AS3	0.566107	3.68626e-33	postive
YTHDC1	AC084018.1	0.480351	4.82385e-23	postive
RBM15	AC073046.1	0.447747	6.8896e-20	postive
RBM15B	AC073046.1	0.425401	6.49691e-18	postive
ZC3H13	AL590705.3	0.410159	1.1963e-16	postive
ZC3H13	AC002553.1	0.431827	1.81867e-18	postive
YTHDC1	AC002553.1	0.427416	4.37105e-18	postive
ZC3H13	AL390728.6	0.50824	5.04865e-26	postive
YTHDC1	AL390728.6	0.402145	5.21914e-16	postive
HNRNPA2B1	AL390728.6	0.430816	2.22602e-18	postive
YTHDC1	AC000123.1	0.435023	9.55778e-19	postive
YTHDC1	NARF-IT1	0.459647	5.3177e-21	postive
YTHDC1	AC009120.2	0.46738	9.53101e-22	postive
YTHDC1	AC009087.1	0.452858	2.32122e-20	postive
ZC3H13	AC006141.1	0.490912	3.86297e-24	postive
ZC3H13	AL138963.1	0.532748	7.04707e-29	postive
YTHDC1	AL662797.2	0.416546	3.59368e-17	postive
HNRNPA2B1	AL662797.2	0.410012	1.22945e-16	postive
YTHDC1	AC078846.1	0.407194	2.07271e-16	postive
FTO	AL357054.4	0.471207	4.00445e-22	postive
FTO	PART1	0.445069	1.20946e-19	postive
FTO	HAND2-AS1	0.483301	2.4042e-23	postive
HNRNPA2B1	AC092718.2	0.416985	3.30537e-17	postive
YTHDC1	RUSC1-AS1	0.454388	1.67021e-20	postive
METTL3	AC020558.2	0.429915	2.664e-18	postive
YTHDC1	AC020558.2	0.456229	1.12131e-20	postive
YTHDC1	AC008870.2	0.504065	1.46871e-25	postive
ZC3H13	AL139099.3	0.402343	5.03559e-16	postive
ZC3H13	AC015849.4	0.432965	1.4475e-18	postive
HNRNPC	AC104825.1	-0.441316	2.63934e-19	negative
FTO	AC104825.1	0.44469	1.30913e-19	postive
HNRNPA2B1	AC132192.2	0.425199	6.75977e-18	postive
ZC3H13	PRKCZ-AS1	0.414621	5.17722e-17	postive
RBM15	AC012073.1	0.451856	2.87729e-20	postive
HNRNPA2B1	AC012073.1	0.468138	8.03375e-22	postive
ZC3H13	INTS6-AS1	0.440098	3.39278e-19	postive
YTHDC1	AC007622.2	0.426248	5.50168e-18	postive
ZC3H13	AL117379.1	0.414882	4.9278e-17	postive
RBM15	Z68871.1	0.43487	9.85771e-19	postive
FMR1	Z68871.1	0.507438	6.20461e-26	postive
YTHDC1	AL353622.1	0.400492	7.03745e-16	postive
YTHDC1	AL049552.1	0.411788	8.82411e-17	postive
YTHDC2	AL049552.1	0.408375	1.66638e-16	postive
RBM15	AC008735.1	0.403166	4.33595e-16	postive
YTHDC1	AC008735.1	0.505903	9.19571e-26	postive
ZC3H13	AC004951.1	0.41641	3.68814e-17	postive
ZC3H13	TSC22D1-AS1	0.453556	1.99818e-20	postive
YTHDF1	ADNP-AS1	0.494133	1.75707e-24	postive
METTL3	AL135999.1	0.49577	1.17369e-24	postive
YTHDC1	AL135999.1	0.568783	1.59112e-33	postive
ZC3H13	AL354892.3	0.420054	1.83603e-17	postive
ZC3H13	AC084824.6	0.400282	7.30998e-16	postive
YTHDC1	THAP9-AS1	0.483496	2.29556e-23	postive
RBM15	AC091057.1	0.506512	7.86907e-26	postive
YTHDC1	AC091057.1	0.456882	9.72996e-21	postive
FMR1	AC091057.1	0.41719	3.17845e-17	postive
HNRNPA2B1	AC091057.1	0.571028	7.81647e-34	postive
RBMX	AC091057.1	0.411335	9.60631e-17	postive
YTHDC1	AC008105.1	0.408744	1.55611e-16	postive
ZC3H13	AL596202.1	0.404623	3.32396e-16	postive
YTHDC1	AL596202.1	0.42428	8.09097e-18	postive
FTO	AL049838.1	0.413634	6.23798e-17	postive
ZC3H13	AC004076.2	0.492145	2.86003e-24	postive
YTHDC1	AC010761.1	0.42261	1.11998e-17	postive
FTO	AC090044.1	0.461692	3.38985e-21	postive
YTHDC1	AL356299.3	0.408832	1.53105e-16	postive
YTHDF1	RHPN1-AS1	0.461021	3.93055e-21	postive
YTHDC2	AC008906.1	0.524535	6.77219e-28	postive
ZC3H13	THUMPD3-AS1	0.403136	4.35972e-16	postive
YTHDC1	THUMPD3-AS1	0.425032	6.98419e-18	postive
YTHDC2	PITRM1-AS1	0.417812	2.82273e-17	postive
YTHDF1	AL118506.1	0.590948	1.11597e-36	postive
ZC3H13	AL359880.1	0.471252	3.96413e-22	postive
FTO	CARMN	0.443895	1.5454e-19	postive
YTHDC1	AC027601.2	0.451849	2.88168e-20	postive
HNRNPA2B1	AC002116.2	0.407847	1.83735e-16	postive
ZC3H13	AC245060.5	0.466401	1.1876e-21	postive
ZC3H13	AL355488.1	0.488014	7.79042e-24	postive
YTHDC1	AL355488.1	0.537124	2.05696e-29	postive
YTHDC1	AC068790.2	0.417329	3.09545e-17	postive
METTL3	SNHG10	0.49837	6.15634e-25	postive
HNRNPA2B1	SNHG10	0.472525	2.96333e-22	postive
YTHDC1	C1RL-AS1	0.419905	1.88928e-17	postive
IGFBP1	AC022101.1	0.432171	1.6977e-18	postive
METTL3	SNHG20	0.473975	2.12423e-22	postive
YTHDC1	SNHG20	0.445459	1.11453e-19	postive
ZC3H13	AL122010.1	0.413596	6.28265e-17	postive
FTO	AC004637.1	0.423461	9.49171e-18	postive
FTO	AP001107.5	0.476056	1.31398e-22	postive
RBM15	SMG7-AS1	0.474052	2.08717e-22	postive
FTO	AL139220.2	0.410762	1.06918e-16	postive
YTHDC1	SREBF2-AS1	0.444658	1.31809e-19	postive
HNRNPA2B1	SREBF2-AS1	0.484004	2.03423e-23	postive
METTL3	AL355075.2	0.432102	1.72115e-18	postive
YTHDC1	AL355075.2	0.424547	7.67872e-18	postive
LRPPRC	AL391121.1	-0.436637	6.88874e-19	negative
FTO	AC009102.2	0.515823	6.98859e-27	postive
YTHDC1	AP001107.4	0.493125	2.25052e-24	postive
YTHDC1	AL050343.2	0.471332	3.89214e-22	postive
YTHDC2	AL050343.2	0.469517	5.8806e-22	postive
YTHDC1	AC132872.3	0.446472	9.01268e-20	postive
YTHDC1	AL138787.2	0.419216	2.15717e-17	postive
ZC3H13	DNAJC3-DT	0.546423	1.41509e-30	postive
YTHDC1	AC002553.2	0.500435	3.67245e-25	postive
HNRNPA2B1	AC020658.4	0.402762	4.66614e-16	postive
YTHDC2	PSMD6-AS2	0.423599	9.24012e-18	postive
ZC3H13	AC024267.4	0.433905	1.19806e-18	postive
METTL3	SNHG21	0.480261	4.92744e-23	postive
YTHDC1	AC018766.1	0.428851	3.29113e-18	postive
FTO	CYP1B1-AS1	0.465473	1.46209e-21	postive
ZC3H13	AC107375.1	0.538663	1.32863e-29	postive
YTHDC1	Z82243.1	0.406133	2.52021e-16	postive
FTO	AP001528.1	0.478961	6.68216e-23	postive
HNRNPA2B1	TYMSOS	0.41662	3.54372e-17	postive
ZC3H13	AC127024.5	0.453925	1.84538e-20	postive
YTHDC1	AC127024.5	0.411651	9.05368e-17	postive
ZC3H13	AL158063.1	0.439866	3.55855e-19	postive
METTL3	AC107068.1	0.456682	1.01632e-20	postive
YTHDC1	AC107068.1	0.475843	1.38041e-22	postive
IGFBP2	AC079834.2	0.422009	1.25839e-17	postive
ZC3H13	AC011462.4	0.408851	1.52578e-16	postive
YTHDC1	AC011462.4	0.455299	1.37161e-20	postive
ZC3H13	AC004477.3	0.406916	2.18198e-16	postive
YTHDC1	AC138393.3	0.433456	1.3115e-18	postive
YTHDC1	AC004908.2	0.47035	4.86736e-22	postive
ZC3H13	AL162274.2	0.405674	2.74189e-16	postive
YTHDC1	AL139407.1	0.437699	5.54754e-19	postive
YTHDC1	AL031714.1	0.40015	7.48507e-16	postive
FTO	AL139147.1	0.429603	2.83482e-18	postive
YTHDC1	AL360181.2	0.443878	1.55098e-19	postive
FTO	STARD4-AS1	0.427033	4.71381e-18	postive
ZC3H13	AP000254.2	0.403842	3.83315e-16	postive
FTO	AL445426.1	0.448115	6.37387e-20	postive
YTHDC1	AL133367.1	0.407225	2.0609e-16	postive
ZC3H13	AC007216.3	0.402479	4.91239e-16	postive
ZC3H13	ITCH-IT1	0.405282	2.94616e-16	postive
HNRNPC	AC007637.1	-0.50625	8.41394e-26	negative
IGFBP2	AC022031.2	0.430877	2.19946e-18	postive
LRPPRC	MIR497HG	-0.414609	5.18914e-17	negative
HNRNPA2B1	MIR497HG	-0.454189	1.74321e-20	negative
FTO	MIR497HG	0.424532	7.70171e-18	postive
METTL3	SNHG4	0.444884	1.25719e-19	postive
LRPPRC	SNHG4	0.497384	7.86694e-25	postive
HNRNPA2B1	AC120049.1	-0.415534	4.35554e-17	negative
FTO	AC120049.1	0.450797	3.60786e-20	postive
HNRNPA2B1	AL033527.3	0.405234	2.97203e-16	postive
ZC3H13	PTOV1-AS2	0.4377	5.54729e-19	postive
YTHDC1	PTOV1-AS2	0.556949	6.1698e-32	postive
YTHDC1	ZNF32-AS2	0.460553	4.35746e-21	postive
YTHDC1	AC015871.3	0.432657	1.53981e-18	postive
YTHDC1	AC040162.3	0.41227	8.06289e-17	postive
YTHDC1	AC012020.1	0.415605	4.29701e-17	postive
HNRNPA2B1	GAS1RR	-0.426278	5.46931e-18	negative
FTO	GAS1RR	0.498384	6.13397e-25	postive
ZC3H13	ZNF451-AS1	0.432694	1.52841e-18	postive
YTHDC1	AL022328.1	0.489121	5.96344e-24	postive
LRPPRC	NR2F1-AS1	-0.401308	6.07325e-16	negative
FTO	NR2F1-AS1	0.513892	1.1616e-26	postive
ZC3H13	AC004253.1	0.44599	9.97107e-20	postive
YTHDC1	AC004253.1	0.412143	8.25701e-17	postive
METTL14	AC012313.5	0.431497	1.94314e-18	postive
FTO	AC012313.5	0.499734	4.37832e-25	postive
YTHDC1	AC002128.1	0.460863	4.07019e-21	postive
YTHDC1	Z98884.2	0.472307	3.11498e-22	postive
FMR1	Z98884.2	0.423877	8.75255e-18	postive
YTHDC2	AC108449.2	0.465038	1.61161e-21	postive
YTHDF3	AC108449.2	0.475006	1.67502e-22	postive
YTHDC1	AC093788.1	0.431955	1.77291e-18	postive
ZC3H13	LINC00562	0.455658	1.26908e-20	postive
FTO	AC012636.1	0.421847	1.29857e-17	postive
METTL3	PRMT5-AS1	0.418214	2.61398e-17	postive
HNRNPA2B1	TMPO-AS1	0.454698	1.56214e-20	postive
YTHDC1	AC011825.2	0.42646	5.2771e-18	postive
ZC3H13	KANSL1L-AS1	0.405167	3.00884e-16	postive
YTHDC1	KANSL1L-AS1	0.504366	1.36041e-25	postive
ZC3H13	LINC01355	0.400734	6.73709e-16	postive
YTHDC1	LINC01355	0.442775	1.95102e-19	postive
YTHDC1	NADK2-AS1	0.402543	4.85595e-16	postive
ZC3H13	AC120053.1	0.489374	5.61032e-24	postive
ZC3H13	AC010834.3	0.470285	4.94038e-22	postive
ZC3H13	AC005261.1	0.555274	1.02322e-31	postive
YTHDC1	AC005261.1	0.460312	4.59506e-21	postive
ZC3H13	HCG18	0.418418	2.51358e-17	postive
FTO	AC025165.1	0.529087	1.9471e-28	postive
YTHDC1	AL008718.3	0.445327	1.14583e-19	postive
ZC3H13	AL136295.7	0.511102	2.40721e-26	postive
YTHDC1	AL136295.7	0.440265	3.278e-19	postive
YTHDC1	AC127502.2	0.450707	3.67778e-20	postive
ZC3H13	TPT1-AS1	0.550337	4.47218e-31	postive
HNRNPC	TPM1-AS	-0.434151	1.14008e-18	negative
ZC3H13	AL139089.1	0.551219	3.44253e-31	postive
ZC3H13	AC002398.1	0.428337	3.64387e-18	postive
HNRNPA2B1	AC002398.1	0.449205	5.06111e-20	postive
METTL16	ENTPD1-AS1	0.408781	1.5457e-16	postive
FTO	ENTPD1-AS1	0.40343	4.13205e-16	postive
FTO	BARX1-DT	0.503972	1.50357e-25	postive
FTO	AC009126.1	0.404795	3.22099e-16	postive
YTHDC1	IGBP1-AS1	0.418381	2.53152e-17	postive
ZC3H13	LENG8-AS1	0.433653	1.26033e-18	postive
YTHDC1	LENG8-AS1	0.414107	5.70603e-17	postive
METTL3	KDM4A-AS1	0.445411	1.12581e-19	postive
YTHDC1	KDM4A-AS1	0.428573	3.47771e-18	postive
ZC3H13	AL158196.1	0.480187	5.01336e-23	postive
METTL3	ELOA-AS1	0.404894	3.163e-16	postive
RBM15	AC099850.4	0.511173	2.3635e-26	postive
YTHDF1	AC099850.4	0.458873	6.30174e-21	postive
YTHDF2	AC099850.4	0.49344	2.08309e-24	postive
HNRNPC	AC099850.4	0.476246	1.25724e-22	postive
LRPPRC	AC099850.4	0.419416	2.07568e-17	postive
HNRNPA2B1	AC099850.4	0.535802	2.98993e-29	postive
RBMX	AC099850.4	0.439085	4.17751e-19	postive
ZC3H13	AL137058.2	0.402784	4.64739e-16	postive
YTHDC1	AC068790.5	0.416591	3.56291e-17	postive
FTO	FAM66C	0.42302	1.03421e-17	postive
ZC3H13	DLGAP4-AS1	0.416066	3.93701e-17	postive
FTO	AC010478.1	0.507525	6.06749e-26	postive
YTHDC1	AC084876.1	0.43333	1.34514e-18	postive
YTHDC2	AC084876.1	0.437661	5.59108e-19	postive
YTHDC1	AC066613.1	0.479845	5.43241e-23	postive
YTHDC1	MIR4453HG	0.482074	3.21473e-23	postive
YTHDC1	AC021078.1	0.52132	1.61508e-27	postive
YTHDC2	AC021078.1	0.495925	1.12968e-24	postive
YTHDC1	AP001893.1	0.415755	4.1767e-17	postive
YTHDC1	AL513218.1	0.462152	3.06172e-21	postive
YTHDC1	AP4B1-AS1	0.468829	6.87159e-22	postive
YTHDC2	AP4B1-AS1	0.433442	1.31502e-18	postive
YTHDC1	AC007878.1	0.402586	4.81827e-16	postive
ZC3H13	AC084083.1	0.448412	5.98657e-20	postive
YTHDC1	AL049840.6	0.417377	3.06734e-17	postive
ZC3H13	AL442125.2	0.413883	5.95213e-17	postive
YTHDC1	AC104109.4	0.428691	3.39688e-18	postive
YTHDC1	AC016773.2	0.403061	4.41973e-16	postive
YTHDC1	PCBP1-AS1	0.429249	3.04097e-18	postive
YTHDC1	AL049869.3	0.450869	3.55256e-20	postive
METTL3	RNF139-AS1	0.423266	9.85878e-18	postive
VIRMA	RNF139-AS1	0.430148	2.54334e-18	postive
YTHDC1	SNHG12	0.408739	1.55767e-16	postive
RBM15	AC108010.1	0.42888	3.272e-18	postive
YTHDC1	AC108010.1	0.406741	2.25335e-16	postive
YTHDC1	C1orf220	0.448602	5.75042e-20	postive
ZC3H13	AL136531.1	0.452399	2.56131e-20	postive
YTHDC1	AL136531.1	0.400591	6.91307e-16	postive
METTL16	STARD7-AS1	0.409611	1.3248e-16	postive
ZC3H13	HM13-IT1	0.486056	1.24668e-23	postive
YTHDC1	AC124283.3	0.418209	2.61638e-17	postive
YTHDC1	TIMM23B-AGAP6	0.481483	3.6955e-23	postive
YTHDC1	AP002907.1	0.462597	2.77437e-21	postive
HNRNPA2B1	DDX11-AS1	0.403719	3.9203e-16	postive
YTHDC1	AC245060.6	0.483513	2.28594e-23	postive
METTL16	AC018521.6	0.409267	1.4122e-16	postive
FTO	AC018521.6	0.484562	1.78134e-23	postive
ZC3H13	AC020915.2	0.423922	8.67587e-18	postive
YTHDC1	FAM13A-AS1	0.464201	1.94268e-21	postive
YTHDC2	FAM13A-AS1	0.415551	4.34185e-17	postive
ZC3H13	DCUN1D2-AS	0.444455	1.3751e-19	postive
YTHDF1	AL117329.1	0.406884	2.19458e-16	postive
YTHDC1	MCCC1-AS1	0.453178	2.16714e-20	postive
YTHDC1	AC004148.1	0.588667	2.41825e-36	postive
YTHDC1	AC093752.3	0.452055	2.75751e-20	postive
FTO	AC005180.1	0.411584	9.1691e-17	postive
YTHDC1	AC022558.3	0.443123	1.81489e-19	postive
YTHDC1	AL109811.1	0.453206	2.15408e-20	postive
YTHDC1	FMR1-IT1	0.416522	3.61001e-17	postive
FMR1	FMR1-IT1	0.50882	4.34761e-26	postive
ZC3H13	AC007066.2	0.408671	1.57731e-16	postive
YTHDC1	AC007066.2	0.440372	3.20661e-19	postive
FTO	AC053503.3	0.461208	3.7722e-21	postive
YTHDF1	STK4-AS1	0.453239	2.13914e-20	postive
ZC3H13	AL136295.6	0.429473	2.90859e-18	postive
YTHDC1	AC018690.1	0.425792	6.01789e-18	postive
YTHDC1	AC018410.1	0.421622	1.35643e-17	postive
YTHDF1	AL355574.1	0.439005	4.24673e-19	postive
HNRNPA2B1	AP005136.3	0.415384	4.48133e-17	postive
YTHDC1	AL512770.1	0.414444	5.35346e-17	postive
ZC3H13	AL161729.3	0.445498	1.10562e-19	postive
ZC3H13	AC010976.1	0.427108	4.64498e-18	postive
YTHDC1	AC010976.1	0.499424	4.7315e-25	postive
ZC3H13	AL139383.1	0.401217	6.17455e-16	postive
YTHDC1	AC012435.3	0.403012	4.45928e-16	postive
ZC3H13	AC010201.2	0.402551	4.84824e-16	postive
YTHDC1	AC015813.1	0.443476	1.68623e-19	postive
ZC3H13	AC024060.2	0.470756	4.43748e-22	postive
FTO	AL132642.1	0.481433	3.73904e-23	postive
ZC3H13	DLEU1	0.432619	1.5517e-18	postive
HNRNPA2B1	DLEU1	0.456233	1.12048e-20	postive
FTO	PGM5-AS1	0.439819	3.59285e-19	postive
METTL3	AL928654.2	0.437276	6.04756e-19	postive
YTHDC1	AL928654.2	0.519775	2.44427e-27	postive
ZC3H13	ASAP1-IT2	0.512289	1.76736e-26	postive
YTHDC1	AC078778.1	0.45264	2.43224e-20	postive
ZC3H13	AC007038.1	0.44845	5.93868e-20	postive
YTHDC1	AC007038.1	0.404202	3.58986e-16	postive
YTHDC1	CTBP1-AS	0.452022	2.77718e-20	postive
YTHDC1	AC005730.3	0.402177	5.18953e-16	postive
YTHDC1	AC009120.3	0.422783	1.08288e-17	postive
YTHDC1	OCIAD1-AS1	0.429414	2.94304e-18	postive
FTO	AC067750.1	0.492328	2.735e-24	postive
YTHDC1	AC023908.3	0.449354	4.90298e-20	postive
HNRNPC	AC011472.1	-0.408254	1.70421e-16	negative
YTHDC1	AC114730.3	0.462129	3.07725e-21	postive
YTHDC1	AC133550.3	0.402926	4.52887e-16	postive
YTHDC1	AC232271.1	0.469465	5.95047e-22	postive
YTHDC1	LINC00893	0.456158	1.13885e-20	postive
FMR1	LINC00893	0.421782	1.31498e-17	postive
FTO	AF001548.1	0.497007	8.64028e-25	postive
ZC3H13	AC010320.4	0.52152	1.53042e-27	postive
RBM15B	AC137630.1	0.481297	3.86109e-23	postive
IGFBP2	AF279873.3	0.426667	5.06659e-18	postive
YTHDC1	AC004908.1	0.451089	3.38936e-20	postive
YTHDC2	AC004908.1	0.401785	5.57151e-16	postive
YTHDC1	AC005104.1	0.46691	1.05942e-21	postive
YTHDC2	AC005104.1	0.475951	1.34638e-22	postive
FTO	A2M-AS1	0.492376	2.70283e-24	postive
IGFBP1	AC079305.4	0.412366	7.91871e-17	postive
YTHDC1	AC144548.1	0.427834	4.02477e-18	postive
YTHDC1	ACAP2-IT1	0.486453	1.13377e-23	postive
METTL16	COX10-AS1	0.52356	8.82259e-28	postive
YTHDC1	COX10-AS1	0.489542	5.3856e-24	postive
HNRNPC	AP003071.3	-0.406432	2.38533e-16	negative
HNRNPA2B1	AP003071.3	-0.428345	3.63772e-18	negative
FTO	AP003071.3	0.517114	4.96611e-27	postive
YTHDF1	NORAD	0.541873	5.29728e-30	postive
YTHDC1	AL159169.2	0.401141	6.26014e-16	postive
ZC3H13	AL035461.3	0.485734	1.34662e-23	postive
HNRNPA2B1	AL035461.3	0.461382	3.63e-21	postive
ZC3H13	RAD51-AS1	0.422775	1.08471e-17	postive
YTHDC1	RAD51-AS1	0.504777	1.22547e-25	postive
HNRNPC	AC006059.1	-0.416247	3.8038e-17	negative
FTO	AC006059.1	0.488179	7.48696e-24	postive
YTHDC1	AC084824.4	0.425794	6.0148e-18	postive
YTHDC1	LINC00106	0.420648	1.63737e-17	postive
